# Supplementary material for: Clinical value of serum HBV RNA in patients with chronic hepatitis B during antiviral therapy
Source: PeerJ journal article supplement (doi:10.7717/peerj.20275), 2025-10-30
Supplement: raw_data.xlsx [file raw_data.xlsx]

## Sheet: base
ID			gender	age	BMI	date2	treatment	HBsAg	HBeAg	HBVDNA	HBVRNA	PLT	ALT	AST	TBIL	ALB	ALP	GGT	HARD	OBS	group	group2
1			Female	37	23.6	44288	TDF	4.33537	3.06213	7.33041	7.11077	188	262	126	15.91	36.1	74	24	13	227	NSR	lowrna
2			Male	41	22.6	42036	TDF	2.90539	2.7065	6.62941	6.73834	177	44	29	16.28	37.3	68	22	8	218	NSR	lowrna
3			Male	31	20.05	44391	TAF	4.17695	1.8732	7.53529	7.69897	166	68	48	19.52	39.2	92	29	12.5	209	NSR	highrna
4			Female	30	19.05	41775	TAF	4.60558	2.46437	7.2833	7.60314	207	152	96	9.19	40.4	111	65	10.1	211	SR	highrna
5			Female	34	33.2	38961	TDF	4.44736	2.87741	8.07918	7.75967	181	257	78	16.46	38.5	101	199	5.1	283	SR	highrna
6			Male	58	28.72	40553	TDF	3.40429	1.22968	5.82413	6.30016	49	30	41	52.87	24.3	93	17			SR	lowrna
7			Male	44	23.39	42645	TDF	3.54096	3.09893	6.33445	6.93758	211	53	38	15.91	43.5	77	25	9.9	172	NSR	lowrna
8			Female	36	22	44333	TDF	3.82693	3.14621	7.57634	7.46301	185	110	70	15.74	40.2	95	34	6.5	200	SR	highrna
9			Male	32	20.5	43842	TDF	3.55519	0.117271	5.24055	5.66059	219	27	17	17.67	41	80	34	12	207	NSR	lowrna
10			Male	36	26.2	37012	TDF	3.99796	2.99507	7.94498	7.69897	270	193	75	18.22	44.3	66	41	6.7	286	NSR	highrna
11			Female	39	29.5	40669	ETV	3.28473	2.50057	3.13354	7.06912	227	19	31	7.74	36.2	63	55	6.9	290	NSR	lowrna
12			Male	26	18	40672	ETV	3.99184	3.08194	6.47857	7.26267	215	275	122	9.7	37.4	102	108	6.7	201	SR	highrna
13			Male	36	28.9	44304	TDF	0.471292	0.718502	3.4216	6.45395	96	628	226	215.92	29.5	144	47	14.4	233	NSR	lowrna
14			Female	67	23.73	44220	TDF	2.58715	3.16366	7.35984	6.51114	100	326	355	118.2	25.4	346	99	17.6	225	NSR	lowrna
15			Male	34	23.88	40213	ETV	2.91468	2.47621	5.65514	6.42931	203	329	129	12.53	45.9	92	104	8.2	232	NSR	lowrna
16			Male	34	23.01	40242	ETV	3.95519	1.58906	6.84696	6.96877	232	195	61	15.99	38.5	114	159	16.7	236	SR	lowrna
17			Male	6	15	42771	ETV	3.83381	3.14196	7.66087	7.22235	337	87	76	9.78	42.1	214	14	5.6	192	NSR	lowrna
18			Female	42	21.48	42752	ETV	3.69541	2.44234	7.18469	6.86116	203	53	37	7.91	40.4	120	26	8.2	222	NSR	lowrna
19			Male	47	23.24	44361	TDF	3.49746	1.71198	7.21484	6.87646	28	29	86	38.03	28.5	250	62	14.2	200	NSR	lowrna
20			Female	33	18.82	44362	TDF	4.70556	2.9776	7.0607	7.62664	148	1376	508	12.37	36.1	183	149	9.8	218	NSR	highrna
21			Male	37	29.22	44363	ETV	5.09665	0.952308	8.79449	7.69897	183	1015	404	32.87	37.3	160	702	10.7	255	NSR	highrna
22			Male	3	24.34	44364	ETV	4.53959	3.07848	7.11059	7.1368	318	29	75	4.01	42.2	175	16	6.7	186	NSR	lowrna
23			Male	34	23.53	44370	TDF	3.80018	2.74789	7.26482	7.49083	124	378	144	23.95	36.8	68	122	13	221	NSR	highrna
24			Female	42	23.05	44371	ETV	3.51121	1.83334	5.1038	6.3697	139	46	49	22.58	25	115	99	10.3	222	NSR	lowrna
25			Female	32	20.06	44373	TDF	4.19606	2.96926	8.27184	7.7332	115	86	75	7.54	36.8	50	38	8.9	196	NSR	highrna
26			Male	34	23.45	40715	TDF	4.92086	2.48987	8.4624	7.69897	206	78	49	26.14	38.6	82	90	7.8	235	NSR	highrna
27			Female	31	18.83	40720	TAF	4.23847	1.88497	6.46835	7.69897	167	70	111	9.9	35.5	87	78	13.9	196	SR	highrna
28			Female	38	19.28	44334	ETV	4.20326	3.1157	8.46835	7.69897	223	59	42	13.26	36.4	83	21	4.5	205	NSR	highrna
29			Female	33	20.43	36855	TDF	4.54199	3.06337	7.7574	7.55943	174	27	24	22.44	43.3	46	13	7.1	197	NSR	highrna
30			Male	23	17.72	44387	TDF	4.17695	2.95078	7.00432	6.57972	251	55	27	10.85	45.1	87	25	4.7	216	NSR	lowrna
31			Male	27	22.92	42542	TDF	3.84895	1.85673	7.16137	7.28329	205	123	60	13.43	46.8	134	30	7.3	288	NSR	highrna
32			Male	17	20.52	41497	ETV	4.50814	2.9804	7.60206	7.69897	209	210	120	10.47	37.7	174	65	5.9	176	NSR	highrna
33			Female	39	17.66	37114	ETV	4.7368	3.28453	7.77305	7.69897	208	53	116	14.51	33.8	54	30	6.9	196	NSR	highrna
34			Female	29	19.83	36851	TDF	3.82823	3.24343	8.41664	7.18842	272	248	160	6.37	36.3	73	38	7.4	213	NSR	lowrna
35			Male	43	22.23	37088	TDF	5.09665	3.01869	8.20412	7.69897	165	124	64	9.57	43.2	79	33	6	210	NSR	highrna
36			Male	62	22.31	42598	TDF	3.13696	2.06595	6.54033	6.72668	192	37	31	13.14	43	89	21	6	237	NSR	lowrna
37			Male	61	21.85	40766	ETV	1.83582	2.77956	5.99739	6.35492	76	209	158	75.45	32.7	135	434	16.9	210	NSR	lowrna
38			Male	28	29.02	40494	ETV	4.6967	3.20739	7.94988	7.5292	193	22	21	57.14	44	71	19	7.6	210	NSR	highrna
39			Female	49	29.55	36842	ETV	4.29487	1.42504	8.88649	7.69897	138	323	250	12.56	34.3	146	61	13.7	271	NSR	highrna
40			Male	27	26.67	44089	ETV	3.45263	0.934498	4.71012	7.69897	183	495	117	55.73	37.1	106	88	14.6	237	NSR	highrna
41			Female	29	20.06	36780	ETV	4.18332	2.80435	7.20683	6.53666	253	174	152	14.95	39.7	107	53	7.4	204	NSR	lowrna
42			Male	34	28.34	36779	ETV	4.10149	0.928396	8.78675	7.69897	114	376	168	27.82	31.2	75	163	18.5	249	SR	highrna
43			Male	23	31.48	43724	TDF	4.29487	2.71666	8.31806	7.69897	134	695	373	13.86	34.1	132	121	11.2	250	NSR	highrna
44			Male	74	18.55	44458	ETV	3.83008	1.96769	7.58092	7.06614	60	43	77	32.19	34.3	109	26	18.4	203	NSR	lowrna
45			Male	33	22.05	44482	TDF	4.17391	2.89619	8.25527	7.69897	196	949	610	30.19	36.1	89	100	16.3	249	NSR	highrna
46			Female	38	23.53	36810	TDF	4.38588	3.23187	8.28556	7.69897	248	17	19	9.44	39.3	84	12	6.6	273	NSR	highrna
47			Male	39	29.02	44507	ETV	4.80734	0.897627	7.67025	7.69897	108	755	366	357.44	29.2	271	158			SR	highrna
48			Female	40	28.72	38961	ETV	3.99124	3.08334	7.3927	7.2835	209	112	70	12.7	33.3	100	60	10.9	212	NSR	highrna
49			Male	43	23.39	40553	TDF	4.20806	3.18459	7.22531	7.13727	167	136	57	13.59	38.4	81	52	7	207	SR	lowrna
50			Female	38	22	42645	TDF	4.14524	2.45148	5.76938	7.60917	147	117	128	28.99	33.8	76	92	6.8	181	NSR	highrna
51			Male	44	20.5	44333	ETV	4.37052	2.75123	7.84448	7.69897	121	1105	1050	104.46	33.5	145	171	6.9	211	NSR	highrna
52			Female	37	22.83	44540	TDF	3.13696	0.752816	7.07555	7.69897	53	59	101	34.28	31.2	142	45	15.7	220	NSR	highrna
53			Male	43	21	44538	ETV	4.38588	1.36154	6.61066	6.85853	174	1109	864	246.47	32.2	102	131			NSR	lowrna
54			Male	23	17	44538	TAF	3.4024	3.16776	7.79727	7.69897	116	326	126	19.2	45.3	98	56	15	248	SR	highrna
55			Male	27	20.88	44545	TDF	4.02388	2.63855	7.26951	6.78167	197	652	283	19.34	40.5	104	121	17.4	220	NSR	lowrna
56			Female	38	22.21	37626	TDF	4.24527	2.32915	6.15836	6.70044	181	464	240	19.83	32.7	102	84	11.7	180	NSR	lowrna
57			Male	57	19.03	44561	TDF	4.11331	2.56141	7.63246	6.75744	151	46	73	10.46	34.5	245	256			NSR	lowrna
59			Female	34	21.33	36560	TAF	4.49224	2.74234	6.70329	7.69897	135	62	38	14.89	42.5	53	28	10.7	215	NSR	highrna
60			Male	55	23.7	42940	TAF	4.58929	2.82765	7.57634	6.90488	86	67	56	14.83	38.3	79	22	7.8	225	NSR	lowrna
61			Male	26	23.18	36704	TAF	3.82823	3.1134	8.17609	7.69897	167	440	231	21.41	41	156	111	10.2	219	NSR	highrna
62			Male	35	26.53	38856	TAF	4.50686	2.95781	6.02938	7.03896	157	992	115	36.03	39.7	109	157	11.7	275	SR	lowrna
63			Female	35	18.37	41048	TDF	3.42223	0.103804	6.82086	6.49788	217	216	151	7.32	42.4	93	50	4.7	202	SR	lowrna
64			Male	39	33.03	37126	ETV	4.95404	3.22243	8.93349	7.69897	235	976	467	14.63	39.5	137	95	11.2	312	NSR	highrna
65			Female	42	20	37398	ETV	4.03641	3.17092	7.60531	7.43147	180	179	84	8.85	31.6	77	61	12	209	NSR	highrna
66			Male	28	24.22	40301	TDF	3.69123	2.23915	4.45179	7.21035	160	411	122	30.09	31.1	126	58	20.6	226	NSR	lowrna
67			Male	34	23.66	41063	ETV	5.02783	3.24161	6.09691	7.69897	214	184	63	8.33	41.3	62	69	12.6	259	NSR	highrna
68			Male	29	26.58	44708	TDF	4.53959	3.22976	8.22011	7.69897	263	965	366	28.27	44.4	92	93	11.9	281	NSR	highrna
69			Male	39	24.22	41719	TDF	1.08529	0.553883	4.62737	6.21345	84	132	127	227.22	28.2	296	106	13.4	248	NSR	lowrna
70			Female	61	19.88	43188	ETV	3.25797	0.380211	7.41996	6.58999	96	66	103	31.21	34.6	97	78	23.1	202	SR	lowrna
71			Male	43	31.21	40314	TDF	3.27459	0.243038	6.76938	6.09856	123	1152	847	160.28	35.3	179	250	32.7	296	SR	lowrna
72			Male	40	19.38	33026	TDF	3.99124	2.58038	7.45788	7.14064	302	364	370	19.34	43.9	67	33	8.4	211	NSR	lowrna
73			Male	41	24.73	33026	TDF	4.23142	0.742725	7.22272	7.5426	170	1941	815	68.77	35.7	119	171	23.9	197	SR	highrna
74			Male	21	19.2	40315	TDF	3.76454	2.41494	6.16435	6.74606	243	1141	351	36.66	44	122	163	7.2	200	SR	lowrna
75			Male	40	21.72	36592	ETV	4.95976	3.15467	8.55023	7.69897	205	195	109	11.07	40.9	90	36	11.7	215	NSR	highrna
76			Male	46	22.04	40218	TAF	4.88629	2.90326	8.36549	7.1906	150	25	27	15.56	44.4	47	14	5.6	262	SR	lowrna
77			Male	35	20.83	37416	TAF	3.54096	2.52392	6.63849	7.19859	130	61	46	22.11	32.7	62	59	13.6	218	NSR	lowrna
78			Male	38	18.94	44741	TDF	3.95266	1.72803	6.95036	6.97988	121	1629	1642	100.64	36.7	157	235			SR	lowrna
79			Female	52	31.25	40242	TAF	3.86336	2.62752	7.62634	7.69897	157	831	620	47.15	26.5	100	268	13.5	258	SR	highrna
80			Female	32	24.03	40306	TDF	4.14524	3.11883	7.42651	7.69897	235	33	53	13.6	43.8	53	22	8.7	243	NSR	highrna
81			Female	46	29.62	36255	TDF	3.51337	2.50676	6.90146	7.69897	107	58	81	23.82	39.9	137	93	5.6	252	NSR	highrna
82			Male	9	13.72	42162	ETV	3.72447	3.06257	7.36736	7.08279	297	91	72	4.96	38.5	196	21			NSR	lowrna
83			Male	36	18.56	39906	ETV	4.18571	1.93131	6.22011	6.56659	236	896	471	44.24	39.8	125	279			NSR	lowrna
84			Male	48	26.4	36589	ETV	3.29092	3.12975	5.13354	7.18164	74	83	61	175.24	26.3	159	37			NSR	lowrna
85			Male	41	23.66	35862	ETV	4.60558	3.19139	7.8791	7.69897	162	69	93	9.22	47.7	89	72	16.1	233	NSR	highrna
86			Male	40	23.88	44755	TDF	3.84895	2.45886	6.77452	7.21248	128	267	119	249.04	34.5	83	73	25	216	NSR	lowrna
87			Male	59	22.91	39211	TDF	2.33393	2.13053	6.02119	6.69023	31	29	41	38.34	32.9	73	49			NSR	lowrna
88			Female	31	26.37	37141	TDF	4.16065	3.02111	7.56467	7.23844	203	477	255	13.82	38.1	77	39	8.6	280	NSR	highrna
89			Female	36	20.7	39211	TAF	3.72871	2.69983	6.81558	7.08195	157	286	193	15.16	36.1	60	43	7.5	218	SR	lowrna
90			Male	39	25.71	36378	TAF	4.64927	3.18583	8.25527	7.69897	175	113	57	15.72	37.9	44	26	7.9	271	SR	highrna
91			Female	49	20.2	36684	ETV	2.61804	1.94012	5.18184	6.54687	183	307	154	39.35	35.5	94	162			NSR	lowrna
92			Male	41	23.67	32940	TDF	4.30255	3.10359	7.97497	7.69897	197	634	285	19.27	34	68	204	9.1	230	NSR	highrna
93			Male	28	24.22	44253	TDF	3.67443	2.48087	6.5172	7.69897	221	249	93	19.06	39.6	66	46	6	224	NSR	highrna
94			Male	39	37.13	44792	TDF	3.73825	2.82052	7.91803	7.51771	162	320	136	13.82	36	91	247	12	316	NSR	highrna
95			Male	36	25.71	36589	ETV	4.70556	0.0293838	7.44871	7.69897	75	1248	1081	95.83	33.7	158	358	8.6	273	NSR	highrna
96			Female	38	17.97	36624	TDF	3.39028	2.49262	6.91116	6.74959	220	223	138	19.9	40.4	82	56	15.2	218	NSR	lowrna
97			Male	36	27.76	39906	TDF	4.10368	2.31069	7.75358	7.69897	156	511	323	56.52	38.7	138	163	24.4	268	SR	highrna
98			Female	30	26.67	43195	ETV	3.42146	2.60921	7.18184	6.80783	137	660	1109	18.03	37.7	77	108	15.3	237	NSR	lowrna
99			Female	42	26.04	37810	TDF	3.53474	1.8557	7.90902	6.92905	228	1875	640	145.33	37.5	123	224	21.7	242	NSR	lowrna
100			Female	36	24.77	39696	TDF	3.75114	3.17688	8.19312	7.13634	216	23	20	12.43	40.6	63	18			NSR	lowrna
101			Female	43	24.57	36653	TDF	4.08725	2.96141	8.35793	7.69897	336	49	29	12.93	43.3	63	20	5.4	262	NSR	highrna
102			Male	40	26.3	35829	TAF	2.32938	0.893762	4.97128	5.60012	226	341	168	22.71	40.6	116	253			SR	lowrna
103			Male	25	22.86	42587	TDF	4.75422	3.2137	8.18469	7.69897	274	115	72	12.43	46.1	72	86	4.9	211	NSR	highrna
104			Male	26	22.31	40276	TDF	4.16458	2.87441	7.9058	7.69897	249	355	127	15.57	39.1	107	82			NSR	highrna
105			Male	44	24.54	39547	ETV	4.75111	3.2008	8.12385	7.69897	200	1248	429	46.63	39.3	169	228	8.5	217	NSR	highrna
106			Female	42	23.44	32587	TAF	4.2217	2.83949	8.10721	7.69897	196	187	152	16.36	42.2	61	34	6.7	212	NSR	highrna
107			Female	35	27.77	43928	ETV	3.89322	2.04336	7.3032	7.13216	148	54	38	7.62	38.3	53	31	8.4	250	NSR	lowrna
108			Male	39	33.15	36625	ETV	2.28856	2.87236	6.19866	6.65171	202	301	185	18.32	43	103	104	15.2	281	NSR	lowrna
109			Male	42	30.48	40245	TAF	1.08529	2.78107	5.26007	6.91937	206	400	153	16.6	35.1	101	67	17.4	291	NSR	lowrna
110			Male	38	24.22	40304	TDF	2.31777	2.5876	5.943	6.44278	122	456	155	17.31	37.8	79	113	9	220	NSR	lowrna
111			Female	45	18.82	36683	ETV	3.70123	2.10951	8.00432	7.60993	114	686	848	36.02	39.8	114	433	12.2	220	SR	highrna
112			Male	52	22.68	36320	TDF	4.03641	2.88374	7.32222	7.52664	93	48	61	18.87	27.8	224	61	23.8	240	NSR	highrna
113			Male	39	27.68	40457	TAF	4.49224	2.83501	7.67486	7.69897	154	914	229	41.04	37.2	66	346	17.1	276	SR	highrna
114			Male	35	20.05	41744	TAF	3.62378	1.63175	6.09342	7.0627	199	2170	1475	192.87	38.8	113	333			SR	lowrna
115			Male	34	32.28	35559	TDF	2.79176	1.19368	7.47422	7.69897	116	607	442	29.75	40.1	93	313			NSR	highrna
116			Male	85	18.11	44784	ETV	3.6901	3.06239	6.96142	6.83624	142	48	63	18.4	33.3	103	29			NSR	lowrna
117			Female	34	22.04	38357	TDF	3.04501	0.193125	6.42813	5.81645	298	419	248	8.74	36.3	41	51	5.6	197	SR	lowrna
118			Male	36	30.47	44931	TAF	4.88629	2.40606	7.42488	7.69897	100	457	147	91.81	32.5	62	204	15.8	268	NSR	highrna
119			Male	65	24.22	40307	TAF	4.01099	3.05063	7.90795	7.69897	223	57	31	13.54	45.6	87	35	7.6	251	NSR	highrna
120			Male	28	26.12	36586	ETV	2.908	3.13833	7.68395	7.65129	163	334	113	14.52	38.1	91	183			NSR	highrna
121			Male	34	29.41	45012	ETV	4.84017	3.1853	8.69373	7.69897	168	393	69	9.4	35.9	148	212	7.7	295	NSR	highrna
122			Male	35	25.35	41038	ETV	4.73525	3.18763	7.79796	7.03738	133	472	255	10.68	39.4	140	87	13.2	251	NSR	lowrna
123			Male	54	24.91	45024	TDF	4.27571	3.27089	7.74741	7.08786	175	608	276	13.48	42.1	124	143			NSR	lowrna
124			Male	30	29.41	36589	TAF	3.72447	1.81869	6.8537	6.79573	173	284	90	15.26	41.3	91	107	12.4	272	SR	lowrna
125			Male	21		40212	TAF	3.7425	1.23679	8.14613	7.69897	180	848	374	10.69	49.1	103	72			SR	highrna
126			Male	51		34116	TAF	3.45894	3.13001	8.4216	7.69897	171	415	204	20.64	45.6	97	115			NSR	highrna
127			Male	31		44353	TAF	5.02783	3.06072	8.71684	7.69897	301	238	75	19.25	36.6	62	72	6.3	231	SR	highrna
128			Female	58		40300	ETV	3.8295	1.14551	6.17026	6.73199	78	244	248	25.91	34.9	172	149	32.6	223	NSR	lowrna
129			Male	23		45086	TAF	3.75114	3.14982	7.34044	6.99459	198	200	94	9.28	43.9	86	24	4.4	182	SR	lowrna
130			Male	23		36655	TAF	3.6968	2.88978	7.70842	6.99871	0.434	242	104	19.77	46.1	92	132	5.7	203	NSR	lowrna
131			Female	31		41042	TDF	3.21955	2.58697	6.14613	6.73199	130	1121	817	11.47	41.3	122	102	12.8	170	NSR	lowrna
132			Female	31		45211	TDF	4.70801	2.5511	7.51455	6.98552	0.392	228	113	9.04	41.7	143	33			NSR	lowrna
133			Female	33		36649	TDF	3.6901	2.68244	7.52892	7.06532	216	242	146	18.83	35.5	78	69	9.5	156	NSR	lowrna
134			Female	14		45162	ETV	2.908	2.10813	6.27646	6.65175	261	202	136	11.3	46.6	206	34	6.6	210	NSR	lowrna
135			Male	36		36923	TAF	3.62378	2.78091	7.86982	7.01558	197	228	92	19.89	41.4	145	135	8.1	177	NSR	lowrna
136			Male	32		33362	TAF	3.74812	2.78233	7.8651	7.69897	53	218	170	33.2	34.1	260	152	12.6	194	SR	highrna
137			Female	45		41064	ETV	2.8425	1.25479	6.12057	6.65175	64	59	77	39.18	28.1	286	162			NSR	lowrna
138			Male	28	23.3	44112	ETV	4.65958	3.03722	8.52244	7.63849	187	36	13	14	42.2	160	13	4.1	176	NSR	highrna
139			Male	42	27.47	44689	TDF	3.13503	2.45629	6.88818	8	149	494	284	31.46	39.7	125	126	17.9	201	NSR	highrna

## Sheet: 12week
ID			HBsAg	HBeAg	HBVDNA	HBVRNA	ALT	AST	TBIL	ALB	ALP	GGT	group	group2
3			3.22093	1.57749	5.66839	6.83476	53	41	11.71	37.9	81	39	NSR	highrna
8			3.53496	2.81387	4.52375	6.05319	117	80	11.57	40.9	80	21	SR	highrna
9			3.60021	0.365488	2.0569	5.36437	26	24	8.03	44.9	100	18	NSR	lowrna
10			4.0206	2.88641	4.03743	6.83476	77	80	12.13	46.3	58	72	NSR	highrna
12			2.97221	1.68205	2.14613	5.42812	28	28	11.06	41.8	63	23	SR	highrna
13			3.11533	0.350248	1.86923	5.70526	23	35	15.04	39.7	118	45	NSR	lowrna
16			3.23654	0.892095	2.72916	5.94127	46	31	12.84	42.3	86	24	SR	lowrna
20			4.37291	2.89188	2.38021	6.78728	15	18	7.79	46.1	70	24	NSR	highrna
24			3.56167	1.32469	1.30103	5.69186	23	29	12.88	40.1	99	38	NSR	lowrna
25			3.50901	2.00813	2.12057	6.36685	39	52	7.74	42.3	40	30	NSR	highrna
26			4.1817	1.90358	3.45179	6.76435	32	27	20.36	44.3	79	52	NSR	highrna
27			3.50664	0.597695	2.13354	6.1569	9	23	8.65	43.8	77	15	SR	highrna
30			4.21715	2.96164	4.07555	5.93306	78	46	15.29	42.8	78	19	NSR	lowrna
31			3.75068	1.32325	4.10721	6.56691	33	40	16.54	43.7	143	28	NSR	highrna
34			4.62697	2.72616	4.44248	6.39274	50	95	9.36	42.8	73	53	NSR	lowrna
35			4.88363	2.93456	3.82607	6.83476	260	118	10.29	43.5	98	49	NSR	highrna
38			4.56526	3.2248	5.37107	6.76755	25	22	48.84	46.9	84	15	NSR	highrna
42			3.19945	-0.49485	3.26245	5.35539	33	37	32.9	31.4	72	74	SR	highrna
44			3.08146	1.76908	5.4624	6.21514	36	54	14.61	32.6	71	36	NSR	lowrna
45			3.44736	1.62045	2.32838	5.68021	30	34	7.69	46.5	77	27	NSR	highrna
62			3.7171	-0.306708	2.32634	5.0802	7	17	9.8	43.9	65	35	NSR	lowrna
63			1.84317	-0.366532	1.17609	4.48623	13	40	8.46	42.9	64	40	SR	lowrna
68			3.3351	1.83822	2.52892	5.89518	19	29	18.62	45.6	77	32	NSR	highrna
69			2.84524	0.607455	1.74036	5.6354	42	69	40.99	35	246	65	NSR	lowrna
70			3.03676	-0.167491	2.6464	5.6651	18	36	17.39	39.7	84	30	SR	lowrna
71			2.88266	-0.455932	1.25527	5.40435	28	29	19.32	48.3	55	43	SR	lowrna
72			3.68389	1.1532	2.67394	6.22299	38	43	20.01	43.5	65	18	NSR	lowrna
73			3.28338	-0.431798	3.0086	5.13326	36	32	13.61	43.8	81	35	SR	highrna
74			3.55452	0.889862	3.33646	5.92274	42	31	18.6	51.4	124	34	SR	lowrna
75			4.87865	2.77827	4.50106	6.83476	36	38	6.97	37.8	86	31	NSR	highrna
76			4.53891	-1.02885	7.77815	6.21169	21	23	11.77	44.4	59	15	NSR	lowrna
77			3.37245	1.34262	3.86688	6.30736	25	24	19.13	43	52	35	NSR	lowrna
78			3.37345	-0.107905	3.74819	5.13108	17	26	15.4	43.4	78	46	SR	lowrna
79			3.2593	-0.387216	1.82607	4.60475	33	37	11.85	37.9	58	34	SR	highrna
80			4.027	3.0117	7.09342	6.83476	71	59	19.77	44	52	22	NSR	highrna
82			2.63772	2.71481	4.02119	5.49052	107	163	5.55	42.6	184	57	NSR	lowrna
83			3.01931	0.779596	3.26717	5.70008	102	56	9	44.6	86	124	NSR	lowrna
84			3.27237	2.6316	4.29003	6.6013	44	64	73.27	37.2	144	21	NSR	lowrna
85			3.73111	3.03428	2.65896	5.57427	50	95	9.36	42.8	73	53	NSR	highrna
87			3.1018	2.32769	3.76268	6.06658	39	55	10.38	34.3	163	72	NSR	lowrna
88			2.87905	0.401401	3.06446	5.6144	120	70	14.09	41.5	66	23	NSR	highrna
89			3.03151	-0.578772	2.05308	5.61034	23	35	13.34	41.1	60	13	NSR	lowrna
90			4.32282	-1.01961	3.9196	6.63476	76	43	15.59	43.5	57	22	NSR	highrna
91			3.13895	1.74912	2.96284	5.78025	33	26	19.03	48.7	81	42	NSR	lowrna
92			3.65818	1.30449	2.1271	5.74179	33	30	14.03	46.1	69	40	NSR	highrna
94			3.67637	2.68411	5.51188	6.69828	172	196	12.84	39.2	82	84	NSR	highrna
95			4.16338	0.00860017	2	4.9351	32	24	21.63	41.4	92	41	NSR	highrna
96			3.05896	2.49262	6.91116	5.82142	223	138	19.9	40.4	82	56	NSR	lowrna
97			2.00612	0.367356	1.5682	4.62085	45	46	25.4	38	168	72	SR	highrna
98			3.88391	2.03834	3.30535	5.91826	16	31	5.23	39.2	52	23	NSR	lowrna
99			4.25429	0.510545	2.57978	5.33692	28	27	12.48	43.4	95	59	NSR	lowrna
101			3.91555	0.103804	1.39794	4.9351	12	20	15.14	45.8	42	12	NSR	highrna
102			3.01762	0.181844	2.45939	5.48301	21	26	17.28	40.9	79	65	SR	lowrna
107			3.67027	0.313867	2.26951	5.55921	16	33	11.28	40.6	56	36	NSR	lowrna
108			2.34076	1.06781	1.64345	5.91091	27	33	12.59	48.5	98	44	NSR	lowrna
111			3.84477	-0.180456	3.33646	5.67201	27	34	17.06	41.8	56	31	SR	highrna
113			3.8645	-0.619693	1.61278	6.35623	16	16	33.02	47.8	41	20	NSR	highrna
114			1.60541	-0.118675	1	5.05927	12	19	16.01	47.4	59	20	NSR	lowrna
116			3.20688	2.47782	2.40824	5.95265	67	81	12.26	33.3	111	49	NSR	lowrna
117			2.00574	-0.236572	2.75205	4.48623	33	33	12.66	42.9	37	15	SR	lowrna
121			4.02383	3.01939	4.17319	6.63612	35	25	11.97	42.7	117	27	NSR	highrna
122			4.36414	2.99442	1.92942	6.3779	24	28	18.62	43.1	93	52	NSR	lowrna
125			3.99954	-0.0861861	1.82607	4.97519	16	24	4.74	47.2	87	18	SR	highrna
127			3.8971	-0.964197	3.66558	6.52515	44	40	10.15	45.4	63	40	NSR	highrna
128			3.38487	1.23274	2.69897	5.435	41	52	11.57	42.2	116	57	NSR	lowrna
129			3.5494	-0.979712	2.95231	6.21645	111	53	17.26	45.9	78	17	NSR	lowrna
131			3.28722	2.58697	2.4133	5.09414	33	33	7.7	46.4	86	17	NSR	lowrna
136			3.51272	-0.786124	3.93601	6.71377	55	58	28.85	39	169	36	NSR	highrna

## Sheet: 24week
ID			HBsAg	HBeAg	HBVDNA	HBVRNA	ALT	AST	TBIL	ALB	ALP	GGT	group	group2
5			3.86888	1.14551	1.23045	4.14529	21	24	9.58	43.1	82	25	SR	highrna
6			2.9298	0.100371	1.99106	4.23284	30	42	51.62	28.9	77	23	SR	lowrna
8			2.67056	0.49276	1	4.62448	21	22	13.72	42.1	85	9	SR	highrna
9			3.65475	0.49693	1.91851	3.87399	24	23	17.29	43.5	100	17	NSR	lowrna
10			3.94377	2.77204	2.83506	6.20673	56	55	12.17	45.6	65	68	NSR	highrna
11			3.56101	2.00753	1.89763	5.00151	16	25	5.9	30.8	54	24	NSR	lowrna
19			2.61183	1.05423	1.9345	5.66939	21	58	19.3	35.8	288	51	NSR	lowrna
29			4.26593	3.04154	2.00206	5.97741	40	37	19.63	47.8	63	15	NSR	highrna
31			3.7042	0.187521	1.47506	4.97085	37	27	16.71	46.5	132	18	NSR	highrna
35			3.95593	2.10377	3.5302	6.0132	146	77	8.25	46.5	82	46	NSR	highrna
46			4.43416	3.19889	1.98677	6.19074	16	18	10.56	39.7	103	12	NSR	highrna
47			3.9806	-0.420216	1.99123	5.66707	23	26	16.25	32.7	137	145	SR	highrna
48			1.82633	2.6439	1.42607	5.52414	24	22	13.94	34.6	75	11	NSR	highrna
52			2.93337	0.506505	1.39934	5.52641	31	92	19.5	37.3	154	34	NSR	highrna
54			1.79421	-0.4627	1.38021	5.40129	17	15	17.41	47.1	67	17	NSR	highrna
62			3.78093	-0.256459	2.02325	3.68689	22	20	10.8	45.4	55	21	NSR	lowrna
72			3.63961	1.53908	1	4.55939	14	23	14.6	39.7	64	10	NSR	lowrna
73			2.98238	-0.408935	1	4.66707	31	30	11.32	40.7	94	25	SR	highrna
77			3.39271	1.23096	2.24055	5.68227	24	30	21.47	46.1	54	30	NSR	lowrna
78			3.52502	-0.283997	1.44716	4.1779	17	25	16.29	45.9	80	17	SR	lowrna
90			4.01515	-0.957958	3.31387	6.04606	54	34	16.51	45.5	60	22	NSR	highrna
94			3.16648	1.92814	2.71012	4.73063	44	39	8.66	39.9	72	80	NSR	highrna
97			1.57368	-0.136677	1	3.23284	48	36	13.44	44.2	133	68	SR	highrna
98			3.75153	1.13033	2.19239	4.48156	16	31	5.23	39.2	52	23	NSR	lowrna
103			3.3554	1.18327	1.4624	6.24606	16	25	14.64	43.6	56	22	NSR	highrna
107			3.41172	0.4843	1	4.01565	35	29	10.56	44.2	43	21	NSR	lowrna
111			1.861	-0.468521	1.17609	4.15347	15	22	21.89	43.7	39	21	SR	highrna
113			0.972203	-0.328924	1.41291	4.49761	23	21	31.21	48.4	42	22	NSR	highrna
120			3.60845	0.961895	1.41291	4.90403	44	27	15.9	50.1	77	96	NSR	highrna
121			4.62974	2.86697	4.4183	4.93951	21	19	9.91	44.4	135	12	NSR	highrna
122			3.62716	0.940018	2.11059	5.6303	31	36	13.32	45	109	53	NSR	lowrna
124			3.64625	-0.184223	1	4.68839	22	21	10.47	45.8	86	22	NSR	lowrna

## Sheet: 36week
ID			HBsAg	HBeAg	HBVDNA	HBVRNA	ALT	AST	TBIL	ALB	ALP	GGT	group	group2
3			3.00763	1.08672	3.32015	5.37226	47	37	36.16	45.5	71	33	NSR	highrna
5			3.79402	1.26811	1	3.78323	18	18	5.6	45	108	23	SR	highrna
6			2.86523	0.161368	1	4.62757	39	50	39.13	33.3	91	30	SR	lowrna
10			4.05906	2.62604	2.1959	5.35822	36	35	12	46.6	66	45	NSR	highrna
12			3.03519	1.37328	1	4.04341	12	17	13.74	44.9	80	15	SR	highrna
13			3.38479	1.02036	1	4.29913	49	38	10.38	47.9	123	38	NSR	lowrna
14			1.30384	0.33646	1	3.82745	38	45	14.91	39.9	290	28	NSR	lowrna
16			3.30941	0.779596	1.96848	5.83466	28	24	10.4	46.2	85	27	SR	lowrna
36			2.57774	1.24576	1	5.37226	20	20	12.8	41.7	113	17	NSR	lowrna
42			3.28442	-0.468521	1.25527	3.83117	44	37	13.73	39.5	57	62	SR	highrna
44			2.8244	0.459392	1.78533	4.56052	32	46	22.95	40.9	91	36	NSR	lowrna
46			4.36027	3.15859	1.85733	5.40055	15	19	6.95	38.7	93	14	NSR	highrna
50			3.06231	0.557507	1	4.08122	20	33	14.07	44.9	51	10	NSR	highrna
52			2.93566	0.0899051	1.43136	4.94354	52	86	21.22	42.2	126	34	NSR	highrna
62			3.65906	-0.206016	1	3.55059	15	18	10.2	44.5	61	19	NSR	lowrna
66			3.82535	2.10507	1.50515	4.87827	56	45	14.32	49.7	108	39	NSR	lowrna
73			2.83914	-0.443697	1.04139	2.9154	38	28	8.28	42.8	76	28	SR	highrna
74			3.65046	0.856729	1.44716	3.39025	18	22	14.62	48.8	106	28	SR	lowrna
77			3.3554	1.18327	1.43136	4.79758	15	19	12.54	43.8	51	22	NSR	lowrna
78			3.76841	-0.443697	1	3.62573	17	22	14.77	47.2	79	15	SR	lowrna
84			3.08283	0.999565	1.8451	4.89439	30	42	31.21	36.9	22	186	NSR	lowrna
86			0.862728	0.181844	1	3.622	13	18	17.28	46.8	62	13	NSR	lowrna
88			2.71878	0.401401	1	3.622	35	23	14.09	41.5	66	23	NSR	highrna
89			3.23682	-0.51502	1.20412	4.00676	20	34	11.99	44.8	58	10	NSR	lowrna
90			3.64796	-0.911419	2.75128	5.04307	52	32	18.63	44.1	54	23	NSR	highrna
98			3.65965	0.812913	1.6721	4.30547	18	28	8.13	41.4	48	17	NSR	lowrna
103			4.32987	2.98567	2.32838	5.18451	32	27	15.23	48.1	82	34	NSR	highrna
107			3.18933	0.09691	1	3.95244	16	25	13.91	42.6	51	30	NSR	lowrna
108			2.02214	0.70927	1	4.18403	38	28	15.61	49.8	132	41	NSR	lowrna
111			1.92988	-0.468521	1	2.74223	11	20	19.69	42.8	38	20	SR	highrna
116			2.81902	1.97877	1	3.82661	13	25	12.94	35	97	14	NSR	lowrna

## Sheet: 48week
ID			HBsAg	HBeAg	HBVDNA	HBVRNA	ALT	AST	TBIL	ALB	ALP	GGT	group	group2
8			2.65565	-0.346787	1.17609	3.7727	22	27	11.26	42.2	96	10	SR	highrna
10			4.02857	2.48126	2.07188	5.15555	62	31	16.51	45.8	65	40	NSR	highrna
20			4.29873	2.86417	2.63448	5.37116	26	21	5.43	42.1	58	31	NSR	highrna
26			3.52903	1.30449	1.85126	5.04991	27	22	18.26	43.3	76	36	NSR	highrna
27			3.7596	0.0128372	1	4.60343	14	22	9.81	42.4	66	10	SR	highrna
35			3.82757	1.82756	2.83123	4.69893	156	80	10.63	40.9	80	25	NSR	highrna
42			3.30187	-0.408935	1	3.00729	39	32	15.2	41.6	67	54	SR	highrna
46			4.32425	3.14428	2.10721	5.30012	15	20	8.06	37.9	103	11	NSR	highrna
49			3.49071	2.91628	1.59106	4.75934	27	28	22.6	44.4	92	12	SR	lowrna
51			3.33499	0.891537	1.66276	4.3287	12	19	9.4	44.3	65	15	NSR	highrna
52			2.86134	0.5302	1.25527	4.69199	44	67	15.87	42.1	135	31	NSR	highrna
62			3.59	-0.253223	1	3.07534	16	17	8.98	46.2	70	16	NSR	lowrna
73			3.40007	-0.49485	1	3.14956	27	22	11.19	44.5	93	21	SR	highrna
74			3.71164	-0.455932	1.54407	3.42212	20	22	9.17	47.3	97	25	SR	lowrna
77			3.38685	1.1209	1.32222	4.23934	14	20	18.69	44.8	24	50	NSR	lowrna
78			3.65	-0.455932	1	3.58494	20	23	18.65	47.2	80	20	SR	lowrna
80			3.89211	2.83727	6.90417	5.47681	69	66	11.42	35.3	51	23	NSR	highrna
82			1.10483	1.40295	1	3.19722	14	33	6.44	43.8	243	19	NSR	lowrna
84			2.92726	0.0899051	1.20412	4.06881	17	33	26.55	39.9	200	19	NSR	lowrna
85			3.538	2.89222	1	3.19722	17	20	7.25	47.4	73	41	NSR	highrna
89			3.25229	-0.385819	1	3.67611	20	30	15.03	43.6	61	10	NSR	lowrna
90			3.18011	-0.874891	1.17609	4.52971	28	23	18.6	45.1	53	24	NSR	highrna
98			3.75719	0.837588	1	3.70688	8	22	6.61	44.5	49	17	NSR	lowrna
102			2.99211	-0.275724	1	3.81741	17	21	9.13	47.2	88	27	SR	lowrna
107			3.00993	0.305351	1	3.51969	25	28	11.3	47.5	51	21	NSR	lowrna

## Sheet: 60week
ID			HBsAg	HBeAg	HBVDNA	HBVRNA	ALT	AST	TBIL	ALB	ALP	GGT	group	group2
4			3.75122	-0.408609	1	3.88745	23	23	10.89	44.5	58	13	NSR	highrna
5			3.60553	1.21272	1	3.42752	22	220	8.39	44.7	72	26	SR	highrna
6			2.84223	-0.207608	1	3.96992	28	40	70	28.3	150	15	SR	lowrna
9			3.47425	0.741152	1	3.05247	28	23	10.28	46.6	116	21	NSR	lowrna
10			3.98072	2.25672	2	5.0108	62	52	13.25	46.5	59	71	NSR	highrna
11			3.78443	1.98731	1	4.11248	12	22	7.74	42.7	50	24	NSR	lowrna
12			3.07119	-0.236572	1	3.3171	19	23	17.5	44.1	70	16	SR	highrna
14			1.59218	0.167317	1	3.05908	34	41	11.98	44.9	174	21	NSR	lowrna
16			3.27935	0.540329	1	3.57772	22	20	22.35	46.4	84	24	SR	lowrna
18			3.37193	1.89459	1	3.87177	20	21	12.01	38.1	241	37	NSR	lowrna
20			4.16994	2.84303	1	5.13527	10	16	4.38	38.3	50	12	NSR	highrna
31			3.69258	0.576341	1	4.2897	41	26	16.93	46.3	126	18	NSR	highrna
35			3.65898	1.66172	1	3.8113	130	70	12.48	44.9	90	37	NSR	highrna
42			3.24677	-0.356547	1	2.75131	41	32	15.78	42.9	65	56	SR	highrna
46			4.29203	3.14141	1	5.12993	14	17	9.28	39	100	12	NSR	highrna
47			3.37017	-0.638272	1	4.1281	96	53	27.79	26.9	135	357	SR	highrna
49			3.30895	3.03081	1	4.72746	39	27	20.46	47.3	89	14	SR	lowrna
52			2.7186	0.716838	1	4.21162	44	67	15.87	42.1	135	31	NSR	highrna
62			3.3722	-0.175446	1	2.85247	13	15	10.24	45.6	67	15	NSR	lowrna
72			3.40879	1.21906	1	3.38419	12	21	16.77	43.4	58	9	NSR	lowrna
73			3.4696	-0.21467	1.04139	2.86267	27	26	8.02	44.3	93	22	SR	highrna
75			4.65669	1.94052	3.08636	4.83441	15	22	5.03	43.8	80	12	NSR	highrna
77			3.33796	1.11561	1	3.82628	14	20	18.69	44.8	24	50	NSR	lowrna
